# Supplementary material for: PhenotypeSimulator: A comprehensive framework for simulating multi-trait, multi-locus genotype to phenotype relationships
Source: Oxford University Press journal article supplement (doi:10.1093/bioinformatics/bty197), 2018-03-28
Supplement: bioinformatics_34_17_2951_s1.zip [file bioinformatics_34_17_2951_s1.zip]

Table 1: **Software tools for genotype and phenotypes simulation.** The overview of the software tools is continued in the following two tables.

| <b>Tool</b>              | <b>Reference</b>                      | <b>Genotype simulation</b>                                     | <b>Phenotype simulation</b>                  |
|--------------------------|---------------------------------------|----------------------------------------------------------------|----------------------------------------------|
| MetaSim                  | (Strand, 2002)                        | Demographic and evolutionary models                            | no                                           |
| MS                       | (Hudson, 2002)                        | WrightFisher neutral model                                     | no                                           |
| simuPop                  | (Peng and Kimmel, 2005)               | Forward-time simulation                                        | case-control/quantitative traits             |
| CoaSim                   | (Mailund <i>et al.</i> , 2005)        | Backward-time simulation                                       | case-control                                 |
| GENOME                   | (Liang <i>et al.</i> , 2007)          | Backward-time simulation                                       | no                                           |
| HAP-SAMPLE               | (Wright <i>et al.</i> , 2007)         | Re-sampling approach                                           | case-control and affected-child trio         |
| QuantiNemo               | (Neuenschwander <i>et al.</i> , 2008) | Forward-time simulation                                        | multiple, uncorrelated quantitative traits   |
| ForSim                   | (Lambert <i>et al.</i> , 2008)        | Forward-time simulation                                        | uni-/multivariate quantitative traits        |
| Fregene/SAMPLE           | (Chadeau-Hyam <i>et al.</i> , 2008)   | Forward-time simulation                                        | case-control/one quantitative trait          |
| GenomePop2               | (Carvajal-Rodríguez, 2008)            | Forward-time simulation                                        | no                                           |
| simuGWAS                 | (Peng and Amos, 2010)                 | Forward-time simulation (based on real data); based on simuPop | case-control/quantitative traits             |
| MSMS                     | (Ewing and Hermisson, 2010)           | Backward-time simulation                                       | no                                           |
| phenosim                 | (Günther <i>et al.</i> , 2011)        | no                                                             | case-control/quantitative traits             |
| SimLD                    | (Yuan <i>et al.</i> , 2011)           | Population simulation based on LD-level matching               | case-control                                 |
| Hapgen2                  | (Su <i>et al.</i> , 2011)             | Re-sampling approach                                           | case-control                                 |
| MultiPhen                | (O'Reilly <i>et al.</i> , 2012)       | simple binomial distribution with 2 trials                     | multiple, correlated quantitative traits     |
| SimRare                  | (Li <i>et al.</i> , 2012)             | Forward-time simulation                                        | case-control/one quantitative trait          |
| hypred                   | (Technow, 2014)                       | Forward-time simulation                                        | quantitative traits (?)                      |
| GPOPSIM                  | (Zhang <i>et al.</i> , 2015)          | Mutation-Drift Equilibrium Model                               | case-control/quantitative traits             |
| PLINK                    | (Chang <i>et al.</i> , 2015)          | simple binomial distribution with 2 trials                     | case-control                                 |
| SeqSIMLA2                | (Chung <i>et al.</i> , 2015)          | Forward-time simulation                                        | case-control/two quantitative traits         |
| msprime                  | (Kelleher <i>et al.</i> , 2016)       | Backward-time simulation                                       | no                                           |
| multiTraitGWASsimulation | (Porter and O'Reilly, 2017)           | simple binomial distribution with 2 trials                     | multiple, correlated quantitative traits     |
| Cophesim                 | (Zhbannikov <i>et al.</i> , 2017)     | no                                                             | case-control/one quantitative/survival trait |

Table 2: **Software tools for genotype and phenotypes simulation-** continued.

| Tool                     | Code                    | Link                                                                                                                                                                                                            |
|--------------------------|-------------------------|-----------------------------------------------------------------------------------------------------------------------------------------------------------------------------------------------------------------|
| MetaSim                  | C++                     | <a href="https://cran.r-project.org/web/packages/rmetasim/vignettes/CreatingLandscapes.html">https://cran.r-project.org/web/packages/rmetasim/vignettes/CreatingLandscapes.html</a>                             |
| MS                       | C                       | <a href="http://home.uchicago.edu/rhudson1/source/mksamples.html">http://home.uchicago.edu/rhudson1/source/mksamples.html</a>                                                                                   |
| simuPop                  | Python                  | <a href="http://simupop.sourceforge.net/Main/HomePage">http://simupop.sourceforge.net/Main/HomePage</a>                                                                                                         |
| CoaSim                   | C++/Guile Scheme/Python | <a href="http://users-birc.au.dk/mailund/CoaSim/">http://users-birc.au.dk/mailund/CoaSim/</a>                                                                                                                   |
| GENOME                   | C++                     | <a href="http://csg.sph.umich.edu/liang/genome/download.html">http://csg.sph.umich.edu/liang/genome/download.html</a>                                                                                           |
| HAP-SAMPLE               | C                       | <a href="https://sites.google.com/a/umich.edu/leeshawn/software">https://sites.google.com/a/umich.edu/leeshawn/software</a>                                                                                     |
| QuantiNemo               | C++                     | <a href="https://www2.unil.ch/popgen/softwares/quantinemo/">https://www2.unil.ch/popgen/softwares/quantinemo/</a>                                                                                               |
| ForSim                   | C++                     | <a href="http://anth.la.psu.edu/research/research-labs/weiss-lab/research/research">http://anth.la.psu.edu/research/research-labs/weiss-lab/research/research</a>                                               |
| Fregene/SAMPLE           | C++                     | <a href="https://www.ebi.ac.uk/sites/ebi.ac.uk/files/groups/kersey_service_team/FREGEN/documentation_html">https://www.ebi.ac.uk/sites/ebi.ac.uk/files/groups/kersey_service_team/FREGEN/documentation_html</a> |
| GenomePop2               | C++                     | <a href="http://acraaj.webs.uvigo.es/GenomePop2.html">http://acraaj.webs.uvigo.es/GenomePop2.html</a>                                                                                                           |
| simuGWAS                 | Python                  | <a href="http://simupop.sourceforge.net/Cookbook/SimuGWAS">http://simupop.sourceforge.net/Cookbook/SimuGWAS</a>                                                                                                 |
| MSMS                     | Java                    | <a href="http://www.mabs.at/ewing/msms/">http://www.mabs.at/ewing/msms/</a>                                                                                                                                     |
| phenosim                 | Python                  | <a href="http://evoplant.uni-hohenheim.de/downloads/">http://evoplant.uni-hohenheim.de/downloads/</a>                                                                                                           |
| SimLD                    | C++                     | <a href="https://sourceforge.net/projects/simld/">https://sourceforge.net/projects/simld/</a>                                                                                                                   |
| Hapgen2                  | C++                     | <a href="http://mathgen.stats.ox.ac.uk/genetics_software/hapgen/hapgen2.html">http://mathgen.stats.ox.ac.uk/genetics_software/hapgen/hapgen2.html</a>                                                           |
| MultiPhen                | R                       | <a href="https://cran.r-project.org/web/packages/MultiPhen/index.html">https://cran.r-project.org/web/packages/MultiPhen/index.html</a>                                                                         |
| SimRare                  | Python/C++              | <a href="https://code.google.com/archive/p/simrare/">https://code.google.com/archive/p/simrare/</a>                                                                                                             |
| hypred                   | R                       | <a href="https://cran.r-project.org/src/contrib/Archive/hypred/">https://cran.r-project.org/src/contrib/Archive/hypred/</a>                                                                                     |
| GPOPSIM                  | Fortran                 | <a href="https://github.com/SCAU-AnimalGenetics/GPOPSIM">https://github.com/SCAU-AnimalGenetics/GPOPSIM</a>                                                                                                     |
| PLINK                    | C++                     | <a href="https://www.cog-genomics.org/plink/1.9/">https://www.cog-genomics.org/plink/1.9/</a>                                                                                                                   |
| SeqSIMLA2                | C++                     | <a href="http://seqsimla.sourceforge.net/">http://seqsimla.sourceforge.net/</a>                                                                                                                                 |
| msprime                  | Python/C                | <a href="https://pypi.python.org/pypi/msprime">https://pypi.python.org/pypi/msprime</a>                                                                                                                         |
| multiTraitGWASsimulation | R                       | <a href="http://multitraitgwas.kcl.ac.uk:3838/sim-app/">http://multitraitgwas.kcl.ac.uk:3838/sim-app/</a>                                                                                                       |
| Cophesim                 | Python                  | <a href="https://bitbucket.org/izhbannikov/cophesim">https://bitbucket.org/izhbannikov/cophesim</a>                                                                                                             |

Table 3: **Software tools for genotype and phenotypes simulation-** continued.

| <b>Tool</b>              | <b>Output format</b>                                                           |
|--------------------------|--------------------------------------------------------------------------------|
| MetaSim                  | chosen by user (in R)                                                          |
| MS                       | MS-specific output format described in publicationn/manual                     |
| simuPop                  | chosen by user (in python)                                                     |
| CoaSim                   | xml/txt                                                                        |
| GENOME                   | GENOME-specific output files                                                   |
| HAP-SAMPLE               | genotypes and haplotypes in .txt format                                        |
| QuantiNemo               | FSTAT format                                                                   |
| ForSim                   | chosen by user (in python/R/ruby)                                              |
| Fregene/SAMPLE           | xml                                                                            |
| GenomePop2               | Genepop/Nexus                                                                  |
| simuGWAS                 | chosen by user (in python)                                                     |
| MSMS                     | MS-like output with some MSMS-specific additional lines                        |
| phenosim                 | standard formats for GWAS analysis (plink, blossom, emmax, tassell)            |
| SimLD                    | No output description in publication                                           |
| Hapgen2                  | oxgen format (compatible with Impute2/SNPTEST/GTOOLS)                          |
| MultiPhen                | chosen by user (in R)                                                          |
| SimRare                  | .ped files                                                                     |
| hypred                   | chosen by user (in R)                                                          |
| GPOPSIM                  | GPOPSIM-specific output files                                                  |
| PLINK                    | plink binary .bed, .bim, .fam (genotypes, SNP information, sample information) |
| SeqSIMLA2                | plink binary .bed, .bim, .fam (genotypes, SNP information, sample information) |
| msprime                  | msprime history file in HDF5 format                                            |
| multiTraitGWASsimulation | .txt                                                                           |
| Cophesim                 | EMMAX, BLOSSOC, Plink, QTDT, TASSEL and GenABEL formats                        |

## References

- Carvajal-Rodríguez, A. (2008). GENOMEPOP: A program to simulate genomes in populations. *BMC Bioinformatics*, **9**(1), 223.
- Chadeau-Hyam, M., Hoggart, C. J., O'Reilly, P. F., Whittaker, J. C., De Iorio, M., and Balding, D. J. (2008). Fregene: Simulation of realistic sequence-level data in populations and ascertained samples. *BMC Bioinformatics*, **9**(1), 364.
- Chang, C. C., Chow, C. C., Tellier, L. C., Vattikuti, S., Purcell, S. M., and Lee, J. J. (2015). Second-generation PLINK: rising to the challenge of larger and richer datasets. *GigaScience*, **4**(1), 7.
- Chung, R.-H., Tsai, W.-Y., Hsieh, C.-H., Hung, K.-Y., Hsiung, C. A., and Hauser, E. R. (2015). SeqSIMLA2: Simulating Correlated Quantitative Traits Accounting for Shared Environmental Effects in User-Specified Pedigree Structure. *Genetic Epidemiology*, **39**(1), 20–24.
- Ewing, G. and Hermisson, J. (2010). MSMS: a coalescent simulation program including recombination, demographic structure and selection at a single locus. *Bioinformatics*, **26**(16), 2064–5.
- Günther, T., Gawenda, I., and Schmid, K. J. (2011). phenosim - A software to simulate phenotypes for testing in genome-wide association studies. *BMC Bioinformatics*, **12**(1), 265.
- Hudson, R. R. (2002). Generating samples under a Wright-Fisher neutral model of genetic variation. *Bioinformatics*, **18**(2), 337–338.
- Kelleher, J., Etheridge, A. M., and McVean, G. (2016). Efficient Coalescent Simulation and Genealogical Analysis for Large Sample Sizes. *PLOS Computational Biology*, **12**(5), e1004842.
- Lambert, B. W., Terwilliger, J. D., and Weiss, K. M. (2008). ForSim: a tool for exploring the genetic architecture of complex traits with controlled truth. *Bioinformatics*, **24**(16), 1821–1822.
- Li, B., Wang, G., and Leal, S. M. (2012). SimRare: a program to generate and analyze sequence-based data for association studies of quantitative and qualitative traits. *Bioinformatics*, **28**(20), 2703–2704.
- Liang, L., Zollner, S., and Abecasis, G. R. (2007). GENOME: a rapid coalescent-based whole genome simulator. *Bioinformatics*, **23**(12), 1565–1567.
- Mailund, T., Schierup, M. H., Pedersen, C. N., Mechlenborg, P. J., Madsen, J. N., and Schauser, L. (2005). CoaSim: A flexible environment for simulating genetic data under coalescent models. *BMC Bioinformatics*, **6**(252).
- Neuenschwander, S., Hospital, F., Guillaume, F., and Goudet, J. (2008). quantiNemo: an individual-based program to simulate quantitative traits with explicit genetic architecture in a dynamic metapopulation. *Bioinformatics*, **24**(13), 1552–1553.
- O'Reilly, P. F., Hoggart, C. J., Pomyen, Y., Calboli, F. C. F., Elliott, P., Jarvelin, M.-R., and Coin, L. J. M. (2012). MultiPhen: Joint Model of Multiple Phenotypes Can Increase Discovery in GWAS. *PLoS ONE*, **7**(5), e34861.
- Peng, B. and Amos, C. I. (2010). Forward-time simulation of realistic samples for genome-wide association studies. *BMC Bioinformatics*, **11**(1), 442.
- Peng, B. and Kimmel, M. (2005). simuPOP: a forward-time population genetics simulation environment. *Bioinformatics*, **21**(18), 3686–3687.
- Porter, H. F. and O'Reilly, P. F. (2017). Multivariate simulation framework reveals performance of multi-trait GWAS methods. *Scientific Reports*, **7**, 38837.
- Strand, A. E. (2002). metasim 1.0: an individual-based environment for simulating population genetics of complex population dynamics. *Molecular Ecology Notes*, **2**(3), 373–376.
- Su, Z., Marchini, J., and Donnelly, P. (2011). HAPGEN2: simulation of multiple disease SNPs. *Bioinformatics*, **27**(16), 2304–2305.
- Technow, F. (2014). hypred: Simulation of Genomic Data in Applied Genetics. *R Package*.
- Wright, F. A., Huang, H., Guan, X., Gamiel, K., Jeffries, C., Barry, W. T., Pardo-Manuel de Villena, F., Sullivan, P. F., Wilhelmsen, K. C., and Zou, F. (2007). Simulating association studies: a data-based resampling method for candidate regions or whole genome scans. *Bioinformatics*, **23**(19), 2581–2588.
- Yuan, X., Zhang, J., and Wang, Y. (2011). Simulating linkage disequilibrium structures in a human population for SNP association studies. *Biochemical Genetics*, **49**(5-6), 395–409.
- Zhang, Z., Li, X., Ding, X., Li, J., and Zhang, Q. (2015). GPOPSIM: a simulation tool for whole-genome genetic data. *BMC Genetics*, **16**(1), 10.
- Zhbannikov, I. Y., Arbeev, K. G., Yashin, A. I., and Mitnitski Canada, A. B. (2017). cophesim: a comprehensive phenotype simulator for testing novel association methods [version 1; referees: 2 approved]. *F1000Research*, **6**(1294).
