# Supplementary material for: PhenotypeSimulator: A comprehensive framework for simulating multi-trait, multi-locus genotype to phenotype relationships
Source: Oxford University Press journal article supplement (doi:10.1093/bioinformatics/bty197), 2018-03-28
Supplement: bioinformatics_34_17_2951_s1.zip [file bioinformatics_34_17_2951_s1.zip]

# 1 Simulation scheme for the infinitesimal genetic effects

The following section describes the derivation of the simulation scheme for the infinitesimal genetic effects. A suitable model for simulating the infinitesimal genetic effect  $\mathbf{U} \in \mathcal{R}^{N, P}$  with known  $N \times N$  sample (row) covariance is a matrix-normally distributed random variable, defined by its mean  $\mathbf{M} \in \mathcal{R}^{N, P}$ , its row covariance  $\mathbf{D} \in \mathcal{R}^{N, N}$  and its column covariance  $\mathbf{C} \in \mathcal{R}^{P, P}$ :

$$\mathbf{U} \sim \mathcal{MN}_{N,P}(\mathbf{M}, \mathbf{D}, \mathbf{C}). \quad (1)$$

With the  $N \times N$  sample-by-sample covariance captured in the genetic kinship matrix  $\mathbf{K}$  and  $\mathbf{M} = \mathbf{0}$ , the component of  $\mathbf{U}$  which has to be simulated is the trait-by-trait covariance  $\mathbf{C}$ :

$$\mathbf{U} \sim \mathcal{MN}_{N,P}(\mathbf{0}, \mathbf{K}, \mathbf{C}) \quad (2)$$

The structure of  $\mathbf{C}$  depends on the design of the covariance effect. In order to simulate  $\mathbf{C}$ ,  $\mathbf{G}$  is first expressed in terms of a multivariate normal distribution

$$\text{vec}(\mathbf{U}) \sim \mathcal{N}_{N \times P}(\mathbf{0}, \mathbf{C} \otimes \mathbf{K}). \quad (3)$$

With the Cholesky decomposition of  $\mathbf{K}$  and  $\mathbf{C}$  into  $\mathbf{K} = \mathbf{B}\mathbf{B}^T$  and  $\mathbf{C} = \mathbf{A}\mathbf{A}^T$

$$\text{vec}(\mathbf{U}) \sim \mathcal{N}_{N \times P}(\mathbf{0}, \mathbf{A}\mathbf{A}^T \otimes \mathbf{B}\mathbf{B}^T), \quad (4)$$

which can be rearranged as

$$\text{vec}(\mathbf{U}) \sim \mathcal{N}_{N \times P}(\mathbf{0}, (\mathbf{A} \otimes \mathbf{B})\mathbf{I}(\mathbf{A} \otimes \mathbf{B})^T). \quad (5)$$

$\mathbf{I}$  is the identity matrix. Using the property of a normally distributed random variable  $\mathbf{Y}$  with mean  $\boldsymbol{\mu}$  and covariance matrix  $\boldsymbol{\Sigma}$

$$w\mathbf{Y} \sim \mathcal{N}(w\boldsymbol{\mu}, w\boldsymbol{\Sigma}w^T), \quad (6)$$

we can let  $\text{vec}(\mathbf{U}) = (\mathbf{A} \otimes \mathbf{B})\text{vec}(\mathbf{Y})$  and  $\mathbf{Y} \sim \mathcal{N}_{N \times P}(\mathbf{0}, \mathbf{I})$  such that

$$(\mathbf{A} \otimes \mathbf{B})\text{vec}(\mathbf{Y}) \sim \mathcal{N}_{N \times P}(\mathbf{0}, (\mathbf{A} \otimes \mathbf{B})\mathbf{I}(\mathbf{A} \otimes \mathbf{B})^T) \quad (7)$$

Using (Horn and Johnson, 1985): Lemma 4.3.1, we get

$$(\mathbf{A} \otimes \mathbf{B})\text{vec}(\mathbf{Y}) = \text{vec}(\mathbf{B}\mathbf{Y}\mathbf{A}^T) = \text{vec}(\mathbf{U}). \quad (8)$$

## References

Horn, R. A. and Johnson, C. R. (1985). *Matrix analysis*. Cambridge University Press, New York, 23 edition.
